# Supplementary material for: Updated Phylogeny of Chikungunya Virus Suggests Lineage-Specific RNA Architecture
Source: MDPI journal article supplement (doi:10.3390/v11090798), 2019-08-29
Supplement: s1 [file s1]

# Updated phylogeny of Chikungunya virus suggests lineage-specific RNA architecture

## – Supplement –

Adriano de Bernardi Schneider<sup>1,†</sup>, Roman Ochsenreiter<sup>2,†</sup>, Reilly Hostager<sup>1</sup>, Ivo L. Hofacker<sup>2,3</sup>, Daniel Janies<sup>4</sup>, and Michael T. Wolfinger<sup>2,3,✉</sup>

<sup>1</sup>AntiViral Research Center, Department of Medicine, University of California San Diego, San Diego, 92103, United States of America

<sup>2</sup>Department of Theoretical Chemistry, University of Vienna, Währingerstraße 17, 1090 Vienna, Austria

<sup>3</sup>Research Group BCB, Faculty of Computer Science, University of Vienna, Währingerstraße 29, 1090 Vienna, Austria

<sup>4</sup>Department of Bioinformatics and Genomics, University of North Carolina at Charlotte, Charlotte, 28223, United States of America

<sup>†</sup>These authors have contributed equally to this work.

Correspondence: [michael.wolfinger@univie.ac.at](mailto:michael.wolfinger@univie.ac.at)

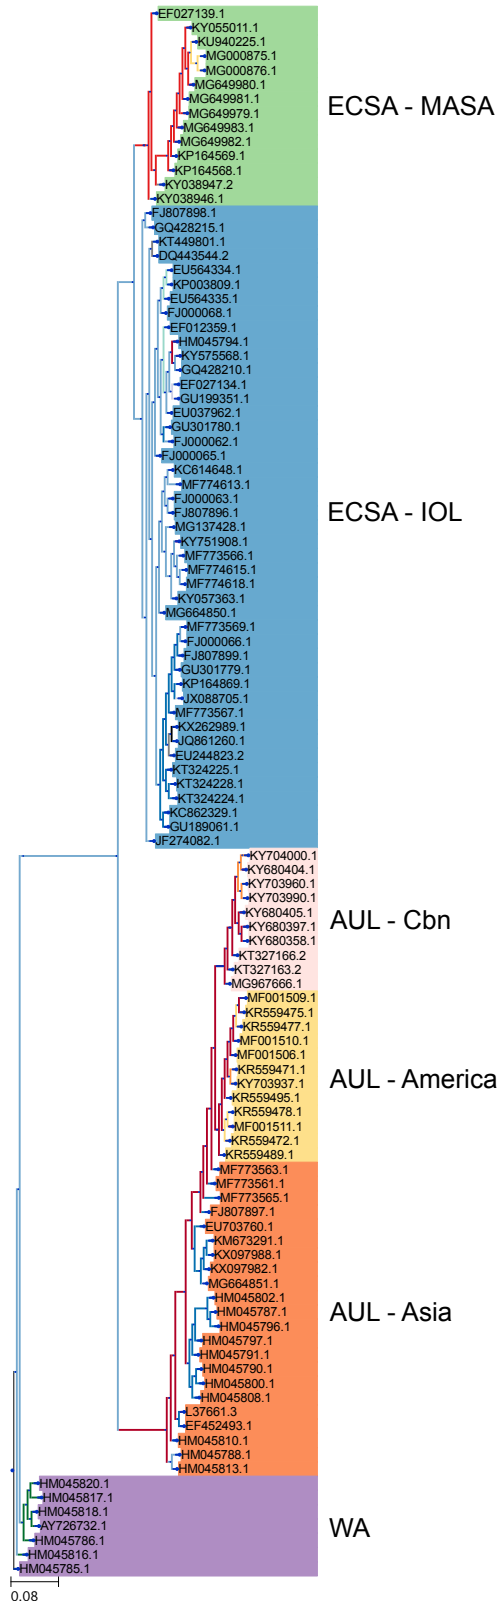

**Fig. 1.** Maximum-Likelihood phylogenetic tree based on a manually curated alignment of 111 complete CHIKV 3'UTRs. Color coding of the tree based on Fig. 1 in main text. Leaves are colored according to lineage, with UTRs harbouring the duplication event in the AUL-American lineage are colored separately.
